# Supplementary material
Source: publisher figshare collection journal article supplement (https://geolsoc.figshare.com/ndownloader/files/20943225)
Supplement: Supplementary file 1 [file 20943225]

## Sheet: Sheet 1
Year	Actual (£ )	Conversion £ to $	Actual or equivalent ($ )	Wholesale price index to 2018 (As retrieved from data at the Bank of Canada Inflation Calculator website www.bankofcanada.ca	Relative(2018)	Source	Page (where captured)	Comment
1842	1,500£	4.8666	7299.9	21.98	160452	Act of1841		Inflation value difficult to obtain before 1914. Used 1914 value for Wholesale Price index
1843	1,500£	4.8666	7299.9	21.98	160452	Act of1841
1844	1,500£	4.8666	7299.9	21.98	160452	Act of1841
1845	2,000£	4.8666	9733.2	21.98	213936	Zaslow p. 48
1846	2,000£	4.8666	9733.2	21.98	213936	Zaslow p. 48
1847	2,000£	4.8666	9733.2	21.98	213936	Zaslow p. 48
1848	2,000£	4.8666	9733.2	21.98	213936	Zaslow p. 48
1849	2,000£	4.8666	9733.2	21.98	213936	Zaslow p. 48		1859 2500£ ($10000)?cut by 50%- only enough for staff salaries,
1850	2,000£	4.8666	9733.2	21.98	213936	Zaslow p. 48
1851	2,000£	4.8666	9733.2	21.98	213936	Zaslow p. 48		1860 5000£- funds restored
1852	2,000£	4.8666	9733.2	21.98	213936	Zaslow p. 48		1861-1863 $20,000
1853	2,000£	4.8666	9733.2	21.98	213936	Zaslow p. 48
1854	2,000£	4.8666	9733.2	21.98	213936	Zaslow p. 48		1864-1869 $20000
1855	2,000£	4.8666	9733.2	21.98	213936	Zaslow p. 48		Zaslow p. 93
1856	5,000£	4.8666	24333	21.98	534839	Zaslow p. 63		1867-1872 $30000
1857	5,000£	4.8666	24333	21.98	534839	Zaslow p. 63		Zaslow p.122
1858	5,000£	4.8666	24333	21.98	534839	Zaslow p. 63		1872-1876 $40000
1859	2,500£	4.8666	9733.2	21.98	213936	Zaslow p. 78
1860	5,000£	4.8666	24333	21.98	439600	Zaslow p. 79
1861			20000	21.98	439600	Zaslow p. 79
1862			20000	21.98	439600	Zaslow p. 79
1863			20000	21.98	439600	Zaslow p. 79
1864			20000	21.98	439600	Zaslow p. 86
1865			20000	21.98	439600	Zaslow p. 86
1866			20000	21.98	439600	Zaslow p. 86
1867			30000	21.98	659400	Zaslow p. 93	122
1868			30000	21.98	659400	Zaslow p. 93	122
1869			30000	21.98	659400	Zaslow p. 93	122
1870			30000	21.98	659400	Zaslow p. 93	122
1871			30000	21.98	659400	Zaslow p. 93	122
1872			30000	21.98	659400	Zaslow p. 93	122
1873			45000	21.98	989100	Zaslow p.122	122
1874			45000	21.98	989100	Zaslow p.122	122
1875			45000	21.98	989100	Zaslow p.122	122
1876			45000	21.98	989100	Zaslow p.122	122
1877			45000	21.98	989100	Zaslow p.122	122
1883			60000	21.98	1318800	Zaslow	132	Not counting salaries that were transferred to civil list
1885			78557	21.98	1.72668e+06	Zaslow	133
1893			109502	21.98	2.40685e+06	Selwyn (1894)
1894			117456	21.98	2.58168e+06	Zaslow	202
1901			115900	21.98	2547482	Bell (1902)	271A
1902			123930	21.98	2.72398e+06	Bell (1903)	472A
1903			133142	21.98	2.92646e+06	Bell (1904)	210A
1904			170941	21.98	3.75728e+06	Zaslow	209
1905			170484	21.98	3.74724e+06	Zaslow	209
1906			155856	21.98	3.42571e+06	Summary report Geological Survey	269
1907			227575	21.98	5.0021e+06	Summary report Geological Survey	269
1908			281877	21.98	6.19566e+06	Summary report Geological Survey	269
1909			349956	21.98	7.69203e+06	Summary report Geological Survey	269
1910			391889	21.98	8.61372e+06	Summary report Geological Survey	269
1911			424226	21.98	9.32449e+06	Summary report Geological Survey	269
1912			440377	21.98	9.67949e+06	Summary report Geological Survey	269
1913			522230	21.98	1.14786e+07	Summary report Geological Survey	269
1914			555237	21.98	1.22041e+07	Summary report Geological Survey	269
1915			614388	21.98	1.35043e+07	Summary report Geological Survey
1916			571312	19.43	1.11006e+07	Summary report Geological Survey
1917			518522	16.35	8.47784e+06	GSC summary report for 1917 Part A
1918			500505	14.42	7.21728e+06	GSC summary report for 1918 Part A
1920			672590	11.66	7.84239e+06	Annual report of Department of Mines	328
1921			667181	13.82	9.22044e+06	Annual report of Department of Mines
1922			631672	14.58	9.20977e+06	Annual report of Department of Mines
1923			645419	14.58	9.41021e+06	Annual report of Department of Mines
1924			627488	14.9	9.34957e+06	Dept of Mines report
1925			613255	14.58	8.94126e+06	Dept of Mines report
1926			631755	14.58	9.21099e+06	Dept of Mines report
1927			644780	14.9	9607222	Dept of Mines report
1928			658045	14.58	9.5943e+06	Dept of Mines report
1929			705325	14.42	1.01708e+07	Dept of Mines report
1930			633000	15.07	9539310	Dept of Mines report
1931			656000	16.97	11132320	Dept of Mines report
1932			515928	18.37	9.4776e+06	Dept of Mines report
1933			491098	18.89	9.27684e+06	Dept of Mines report
1934			505622	18.63	9.41974e+06	Dept of Mines report
1935			1439699	18.37	2.64473e+07	Dept of Mines report	373
1936			852672	17.88	1.52458e+07	Dept of Mines report	376
1937			850270	17.19	1.46161e+07	Dept of Mines report
1938			757397	17.64	1.33605e+07	Dept of Mines report	390
1939			740164	17.19	1.27234e+07	Dept of Mines report	390
1940			641761	16.56	1.06276e+07	Dept of Mines report	390
1941			723264	15.41	1.11455e+07	Dept of Mines report	390
1942			1.31761e+06	15.07	1.98564e+07	Dept of Mines report	390
1943			2.91836e+06	14.58	4.25497e+07	Dept of Mines report	390
1944			2.00335e+06	14.74	2.95294e+07	Dept of Mines report	390
1946			450000	13.82	6219000	Zaslow	401
1949			1196404	10.9	1.30408e+07	Zaslow	401
1960			4133000	8.54	35295820	Zaslow	412
1964			7000000	8.13	5.691e+07	Zaslow	417
1971			15000000	6.33	94950000	Zaslow	412
1986			90000000	2.02	181800000	Blackadar (1986) varies slightly from budget sheet found in GSC archives	2
1990			102854000	1.69	173823260	1990 GSC FINANCE - Budget Reductions 90-91
1994			110600000	1.56	172536000	1994 GSC FINANCIAL - Program Expenditure document (pdf) - includes Employee Benefit Plans (EPB)		EPB included
2010			91986400	1.14	104864496	GSC Financial system
2011			84612200	1.11	93919542	GSC Financial system
2012			79300400	1.1	87230440	GSC Financial system
2013			68728000	1.09	74913520	GSC Financial system
2017			74861268	1.02	7.63585e+07	year end GSC 2017-18 report		Added EPB not counted in table
2018			74544601	1	74544601	GSC P8 FSR Template 2018-19		EBP included
